# Supplementary material
Source: PubMed Central journal article supplement (PMC5239749)
Supplement: NIHMS816664-supplement-Supplemental_Data_File___doc___tif__pdf__etc__.pdf [file NIHMS816664-supplement-Supplemental_Data_File___doc___tif__pdf__etc__.pdf]

## Supplementary Figure: Gene expression in skeletal muscle

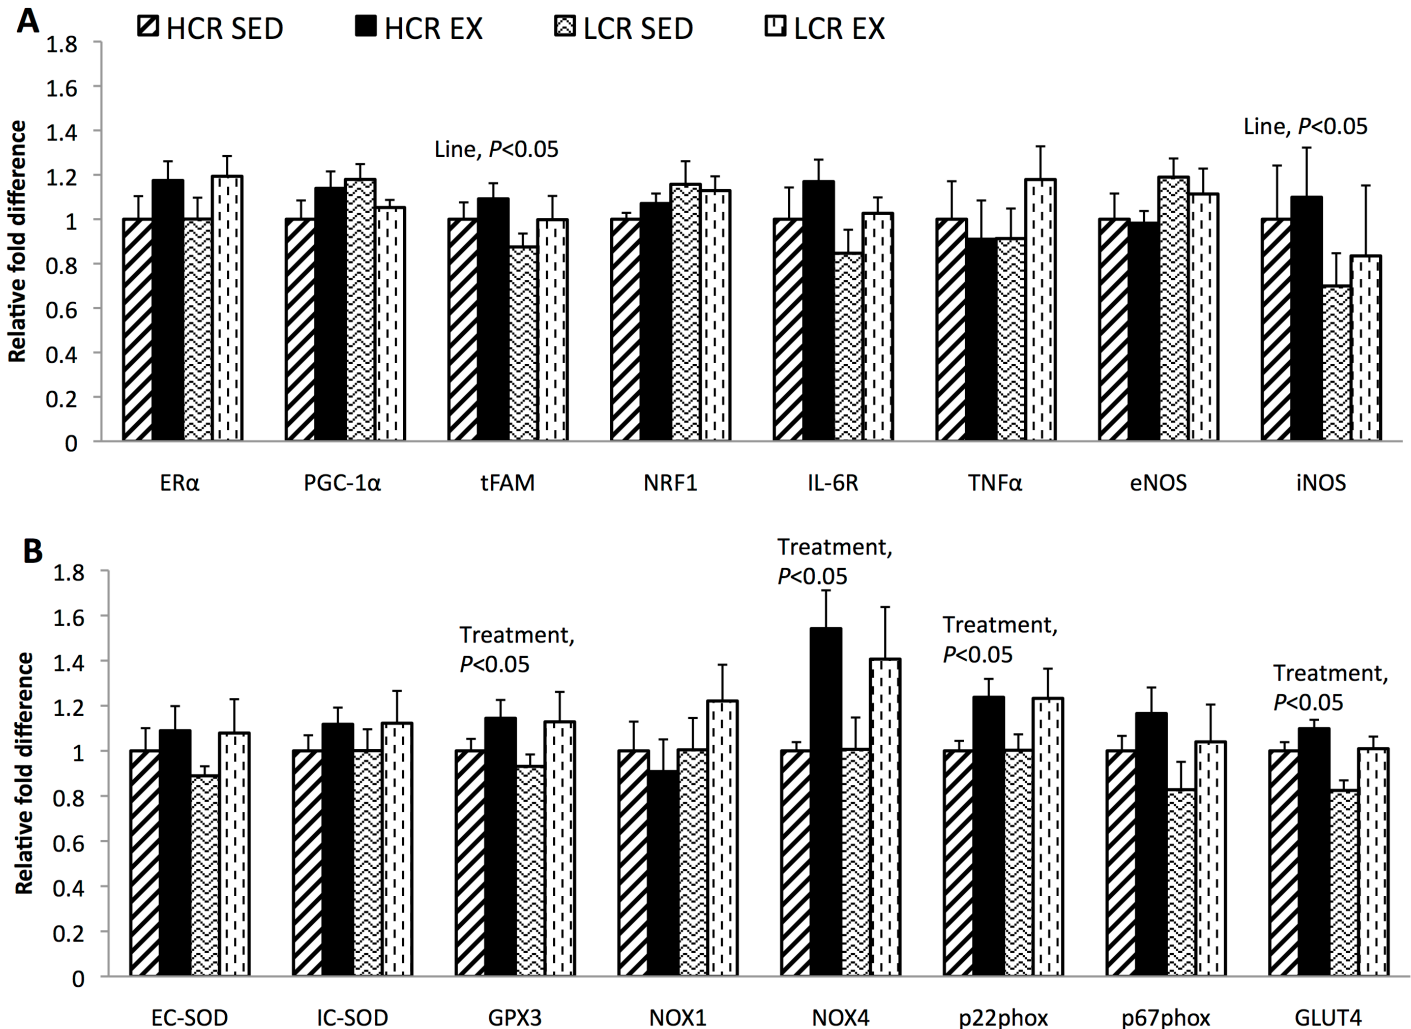

### **Relative mRNA expression of genes associated with skeletal muscle metabolism in**

**ovariectomized LCR and HCR rats fed high fat diet.** Ovariectomized low capacity running (LCR) and high capacity running (HCR) rats fed a high fat diet were given access to a voluntary running wheel (EX) or remained sedentary (SED) for 11 weeks and their gastrocnemius muscle tissues were compared. Data are expressed relative to HCR SED. Values are means  $\pm$  SE (n=6-8 per group). Line = line main effect, HCR vs. LCR; Treatment = treatment main effect, SED vs. EX. ER $\alpha$  = estrogen receptor  $\alpha$ ; PGC-1 $\alpha$  = peroxisome proliferator-activated receptor  $\gamma$  coactivator 1 $\alpha$ ; tFAM = mitochondrial transcription factor A; NRF1 = nuclear respiratory factor 1; IL-6R = interleukin 6 receptor; EC-SOD = extracellular superoxide dismutase; IC-SOD = intracellular superoxide dismutase; GPX3 = glutathione peroxidase; IL = interleukin; TNF $\alpha$  = tumor necrosis factor  $\alpha$ ; eNOS = endothelial nitric oxide synthase; iNOS = inducible nitric oxide synthase; and NOX = NADPH oxidase; GLUT4 = glucose transporter type 4.
